# Supplementary material for: Comment on “A single level tunneling model for molecular junctions: evaluating the simulation methods” by E. M. Opodi, X. Song, X. Yu and W. Hu, Phys. Chem. Chem. Phys. , 2022, 24 , 11958”
Source: Royal Society of Chemistry journal article supplement (doi:10.1039/d2cp05110a), 2024-01-01
Supplement: d2cp05110a2.pdf [file d2cp05110a2.pdf]

**Electronic Supplementary Information for the  
Comment on "A single level tunneling model for molecular  
junctions: evaluating the simulation methods" by Opodi et al**

*Ioan Bâldea*

*Theoretical Chemistry, Heidelberg University, INF 229, D-  
69124 Heidelberg, Germany*

The reader can find below all the problematic issues related to the MATLAB code of ref. 1. Letting alone the five syntactic errors it contains (marked in **red** below in the MATLAB files **Tunneling1SyntaxErrorsCorrected.m** and **FittingSyntaxErrorsCorrected.m**), the main problem is the size mismatch of the variables transmitted from the routine "Tunneling1" to the main program (see the highlighted text in **red** below).

As a possible way to overcome the aforementioned difficulties, we present a compact MATLAB code that can be flexibly adapted to any data fitting based on method 1 (see MATLAB file **IVfittingExcelInput.m** attached).

For the reader's convenience, we also attach a MATLAB code (**generateIVfitIV.m**) able to simulate I-V data using model parameter values and overlaid noise as desired (values highlighted in **magenta** below), used subsequently as input for data fitting.

In all MATLAB codes below, all energies are in electronvolt and currents in Ampère.

```
ls -l Tunneling1SyntaxErrorsCorrected.m FittingSyntaxErrorsCorrected.m
```

```
-rw-r--r-- 1 ioan 984 Dec 28 00:01 FittingSyntaxErrorsCorrected.m  
-rw-r--r-- 1 ioan 1106 Dec 28 00:11 Tunneling1SyntaxErrorsCorrected.m
```

```
ls -l folder.xlsx # input I-V data
```

```
-rw-r--r-- 1 ioan 16600 Dec 27 22:13 folder.xlsx
```

```
cat FittingSyntaxErrorsCorrected.m
```

```
clear;  
clc;  
tdata=xlsread('folder');  
I=((tdata(:,2)));  
V=((tdata(:,1))); % IB: syntax error corrected  
betaT0=[0.3, 1e-3]; % IB: just a specific choice, NOT an error of Opodi et al  
% betaT0=['input Eg g'];  
opts = statset('RobustWgtFun','bisquare','MaxIter',1000);  
betaT=nlinfit(V,I,@Tunneling1,betaT0,opts);  
EgT=betaT(1);  
GamaR=betaT(2);  
betaT1=[EgT GamaR];
```

```

VV=linspace(-2,2,501);
Ifit=Tunneling1(betaT1,VV);
figure(1)
plot(VV,Ifit,'b')
hold on
plot(V,I,'r.')
xlabel('Voltage(v)')
ylabel('Current(A)')
title('Current---Voltage')
grid on

```

#### cat Tunneling1SyntaxErrorsCorrected.m

```

%% Definition of fitting function
function IT=Tunneling1(beta,V)%Function
%% Constant setting
e=1.60217e-19;% electron charge
h=6.62607004e-34;%Planks constant
hbar=h/(2*pi);
% below is the calculation of the I-V
G0=(2*e*e/hbar);% conductance quantum
kT=0.025;
N=1; % IB: syntax error corrected
IV=length(V);
Eg=beta(1);%energy offset
g1=beta(2);%coupling
g2=g1;
g=g2+g1;
alpha=0.5;%voltage division factor
%Energy grid
NE=50001; % IB: syntax error corrected
E=linspace(-5,5,NE); % IB: syntax error corrected
dE=E(2)-E(1); % IB: syntax error corrected
D=(g/(2*pi))./((E.^2)+((g/2)^2));
for iV=1:IV
Vd=V(iV);
UL=(alpha*Vd);
UL2=((1-alpha)*Vd);
f1=1./(1+exp((E-(Eg+UL))./kT));
f2=1./(1+exp((E-(Eg-UL2))./kT));
IT(iV)=((N*dE*G0*(sum(D.*(f1-f2)))*(g1*g2/g)));
end

```

Same error message generated by using matlab/R2020a and matlab/R2021a:

```
matlab -nodisplay -singleCompThread -logfile log -batch FittingSyntaxErrorsCorrected
```

**Error using nlinfit (line 219)**

**MODELFUN must be a function that returns a vector of fitted values the same size as Y (501-by-1). The model function you provided returned a result that was 1-by-501.**

**One common reason for a size mismatch is using matrix operators (\*, /, ^) in your function instead of the corresponding elementwise operators (.\*, ./, .^).**

**Error in FittingSyntaxErrorsCorrected (line 9)**  
**betaT=nlinfit(V,I,@Tunneling1,betaT0,opts);**

```
ls -l generateIVfitIV.m IVfittingExcelInput.m
```

```
-rw-r--r-- 1 ioan 1224 Dec 28 00:33 generateIVfitIV.m  
-rw-r--r-- 1 ioan 1391 Dec 28 00:34 IvfittingExcelInput.m
```

```
ls -l IVcurve.xlsx # I-V data underlying red curve in Fig. 3
```

```
-rwxr-xr-x 1 ioan 5958 Dec 27 23:22 Ivfolder.xlsx
```

```
cat IVfittingExcelInput.m
```

```
clear;  
clc;  
Ivdata=xlsread('Ivcurve.xlsx');% Import IV data to be fitted from an EXCEL file  
I=((Ivdata(:,2)));  
V=((Ivdata(:,1)));  
  
G0 = 77.48e-6;  
kT = 0.0257;  
N = 1;  
e0i = 0.3; Deltai = 1e-3; % Initial guess  
  
betaT0 = [e0i Deltai];  
transm = @(x, e0, GammaGeom, GammaArithm) GammaGeom.^2./((x-e0).^2 +  
GammaArithm.^2);  
fermi = @(x, kT) 1./(1 + exp(x./kT));  
integrand = @(x, e0, GammaGeom, GammaArithm, kT, V) (fermi(x-V./2, kT) - fermi(x  
+ V./2, kT)) .* transm(x, e0, GammaGeom, GammaArithm);  
current = @(V, e0, GammaGeom, GammaArithm, kT) integral(@(x) integrand(x, e0,  
GammaGeom, GammaArithm, kT, V), -inf, inf, 'ArrayValued', true);  
jT = @(beta,V) N .* G0 .* current(V, beta(1), beta(2), beta(2), kT);  
  
% Specify nonlinear fitting model:  
opts = statset('RobustWgtFun','bisquare','MaxIter',1000);  
betaBestFit=nlfit(V,I, @(beta,V) jT(beta, V), [e0i Deltai], opts);  
  
e0BestFit=betaBestFit(1); %fitting result of energy barrier  
GammaTildeBestFit=betaBestFit(2); %fitting result of coupling strength  
  
fprintf(' Best Fit: e0= %12.9g GammaTilde= %12.9g Gamma= %12.9g\n', [e0BestFit;  
GammaTildeBestFit; 2.* GammaTildeBestFit])  
  
Ifit = jT(betaBestFit, V);  
  
% Write fitted I-V curve in ASCII format to plot using e.g. gnuplot or xmgrace:  
for iV=1:length(V)  
    fprintf(' V= %12.9g Iexp= %12.9g Ifit= %12.9g \n', [V(iV); I(iV); Ifit(iV)]);  
end
```

```
matlab -nodisplay -singleCompThread -logfile log -batch IVfittingExcelInput
```

```
Best Fit: e0= 0.269970303 GammaTilde= 0.035484049 Gamma= 0.070968098
```

```
V= -0.7 Iexp= -6.94996305e-06 Ifit= -6.96519544e-06  
V= -0.6972 Iexp= -6.91669218e-06 Ifit= -6.93696214e-06  
V= -0.6944 Iexp= -6.93058737e-06 Ifit= -6.90804291e-06
```

```
.....  
V= 0.6916 Iexp= 6.89873492e-06 Ifit= 6.87842487e-06  
V= 0.6944 Iexp= 6.89666924e-06 Ifit= 6.90804291e-06  
V= 0.6972 Iexp= 6.94525668e-06 Ifit= 6.93696214e-06  
V= 0.7 Iexp= 6.97180084e-06 Ifit= 6.96519544e-06
```

```
cat generateIVfitIV.m
```

```
kT = 0.0257; % Value for room temperature
G0 = 77.48e-6; % Conductance quantum
N = 1; % Number of molecules per junction

% Start I-V data simulation, to be subsequently fitted
transm = @(x, e0, GammaGeom, GammaArithm) GammaGeom.^2./((x-e0).^2 +
GammaArithm.^2); % transmission function
fermi = @(x, kT) 1./(1 + exp(x./kT));
integrand = @(x, e0, GammaGeom, GammaArithm, kT, V) (fermi(x-V./2, kT) - fermi(x
+ V./2, kT)) .* transm(x, e0, GammaGeom, GammaArithm);
current = @(V, e0, GammaGeom, GammaArithm, kT) integral(@(x) integrand(x, e0,
GammaGeom, GammaArithm, kT, V), -inf, inf, 'ArrayValued', true);
jT = @(beta,V) G0 .* current(V, beta(1), beta(2), beta(2), kT); % T-dependent
current

% Using model parameters as in Fig. 3
e0=0.27; Delta = 0.071 ./ 2; GammaGeom = Delta; GammaArithm = Delta;
NVg=501; % Generate I-V curves with 501 points
Vg=linspace(-0.7, 0.7,NVg);

noiseAmplitude = 0.02;
for iV=1:NVg
    % Below, 'rand' is used to add a bit disorder
    Ig(iV) = G0 .* current(Vg(iV), e0, GammaGeom, GammaArithm, kT) + G0 .*
GammaGeom.^2/GammaArithm .* noiseAmplitude .* (rand - 0.5);
    IVsimulated(iV, 1)=Vg(iV); IVsimulated(iV, 2)=Ig(iV);
end

writematrix(IVsimulated, 'IVcurve.xlsx'); % Export I-V curve to an EXCEL file
% End I-V data simulation

% Start data fitting
% Import IV data to be fitted from the EXCEL file
IVdata=xlsread('IVcurve.xlsx');
I=((IVdata(:,2)));
V=((IVdata(:,1)));

e0i = 0.3; Deltai = 0.03; % Initial guess
opts = statset('RobustWgtFun','bisquare','MaxIter',1000);
betaBestFit=nlinfit(V,I, @(beta,V) jT(beta, V), [e0i Deltai], opts);

e0BestFit=betaBestFit(1);
GammaTildeBestFit=betaBestFit(2);

fprintf(' Best Fit: e0= %12.9g GammaTilde= %12.9g Gamma= %12.9g\n', [e0BestFit;
GammaTildeBestFit; 2.* GammaTildeBestFit])

Ifit = jT(betaBestFit, V);

% Write fitted I-V curve in ASCII format to plot using e.g. gnuplot or xmgrace:
for iV=1:length(V)
    fprintf(' V= %12.9g Iexp= %12.9g Ifit= %12.9g \n', [V(iV); I(iV); Ifit(iV)]);
end
```

```
matlab -nodisplay -singleCompThread -logfile log -batch generateIVfitIV
```

Best Fit:  $e_0 = 0.269970303$   $\tilde{\Gamma} = 0.035484049$   $\Gamma = 0.070968098$

|    |         |       |                 |       |                 |
|----|---------|-------|-----------------|-------|-----------------|
| V= | -0.7    | Iexp= | -6.94996305e-06 | Ifit= | -6.96519544e-06 |
| V= | -0.6972 | Iexp= | -6.91669218e-06 | Ifit= | -6.93696214e-06 |
| V= | -0.6944 | Iexp= | -6.93058737e-06 | Ifit= | -6.90804291e-06 |
| V= | -0.6916 | Iexp= | -6.85768076e-06 | Ifit= | -6.87842487e-06 |
| V= | -0.6888 | Iexp= | -6.8427811e-06  | Ifit= | -6.84809535e-06 |
| V= | -0.686  | Iexp= | -6.84111897e-06 | Ifit= | -6.8170419e-06  |
| V= | -0.6832 | Iexp= | -6.79934487e-06 | Ifit= | -6.78525231e-06 |
| V= | -0.6804 | Iexp= | -6.75201301e-06 | Ifit= | -6.7527147e-06  |
| V= | -0.6776 | Iexp= | -6.69609636e-06 | Ifit= | -6.71941751e-06 |
| V= | -0.6748 | Iexp= | -6.66159136e-06 | Ifit= | -6.68534956e-06 |
| V= | -0.672  | Iexp= | -6.67111948e-06 | Ifit= | -6.65050014e-06 |
| V= | -0.6692 | Iexp= | -6.59072399e-06 | Ifit= | -6.61485898e-06 |
| V= | -0.6664 | Iexp= | -6.55498797e-06 | Ifit= | -6.57841635e-06 |
| V= | -0.6636 | Iexp= | -6.54365611e-06 | Ifit= | -6.54116313e-06 |
| V= | -0.6608 | Iexp= | -6.48822807e-06 | Ifit= | -6.50309079e-06 |
| V= | -0.658  | Iexp= | -6.4855148e-06  | Ifit= | -6.46419152e-06 |
| V= | -0.6552 | Iexp= | -6.43035235e-06 | Ifit= | -6.42445823e-06 |
| V= | -0.6524 | Iexp= | -6.36257161e-06 | Ifit= | -6.38388462e-06 |
| V= | -0.6496 | Iexp= | -6.32791424e-06 | Ifit= | -6.34246528e-06 |
| V= | -0.6468 | Iexp= | -6.27640856e-06 | Ifit= | -6.30019565e-06 |
| V= | -0.644  | Iexp= | -6.24996101e-06 | Ifit= | -6.25707217e-06 |
| V= | -0.6412 | Iexp= | -6.24005562e-06 | Ifit= | -6.21309229e-06 |
| V= | -0.6384 | Iexp= | -6.15043723e-06 | Ifit= | -6.16825452e-06 |
| V= | -0.6356 | Iexp= | -6.10003887e-06 | Ifit= | -6.12255851e-06 |
| V= | -0.6328 | Iexp= | -6.06749347e-06 | Ifit= | -6.07600508e-06 |
| V= | -0.63   | Iexp= | -6.01570464e-06 | Ifit= | -6.02859629e-06 |

---

|    |        |       |                |       |                |
|----|--------|-------|----------------|-------|----------------|
| V= | 0.63   | Iexp= | 6.03407547e-06 | Ifit= | 6.02859629e-06 |
| V= | 0.6328 | Iexp= | 6.08741279e-06 | Ifit= | 6.07600508e-06 |
| V= | 0.6356 | Iexp= | 6.12647631e-06 | Ifit= | 6.12255851e-06 |
| V= | 0.6384 | Iexp= | 6.16555739e-06 | Ifit= | 6.16825452e-06 |
| V= | 0.6412 | Iexp= | 6.22246066e-06 | Ifit= | 6.21309229e-06 |
| V= | 0.644  | Iexp= | 6.266649e-06   | Ifit= | 6.25707217e-06 |
| V= | 0.6468 | Iexp= | 6.31153346e-06 | Ifit= | 6.30019565e-06 |
| V= | 0.6496 | Iexp= | 6.35145853e-06 | Ifit= | 6.34246528e-06 |
| V= | 0.6524 | Iexp= | 6.40993094e-06 | Ifit= | 6.38388462e-06 |
| V= | 0.6552 | Iexp= | 6.41003666e-06 | Ifit= | 6.42445823e-06 |
| V= | 0.658  | Iexp= | 6.47732744e-06 | Ifit= | 6.46419152e-06 |
| V= | 0.6608 | Iexp= | 6.49023658e-06 | Ifit= | 6.50309079e-06 |
| V= | 0.6636 | Iexp= | 6.52191429e-06 | Ifit= | 6.54116313e-06 |
| V= | 0.6664 | Iexp= | 6.58603997e-06 | Ifit= | 6.57841635e-06 |
| V= | 0.6692 | Iexp= | 6.61386871e-06 | Ifit= | 6.61485898e-06 |
| V= | 0.672  | Iexp= | 6.65001395e-06 | Ifit= | 6.65050014e-06 |
| V= | 0.6748 | Iexp= | 6.69607396e-06 | Ifit= | 6.68534956e-06 |
| V= | 0.6776 | Iexp= | 6.7361328e-06  | Ifit= | 6.71941751e-06 |
| V= | 0.6804 | Iexp= | 6.74635238e-06 | Ifit= | 6.7527147e-06  |
| V= | 0.6832 | Iexp= | 6.79607216e-06 | Ifit= | 6.78525231e-06 |
| V= | 0.686  | Iexp= | 6.81436716e-06 | Ifit= | 6.8170419e-06  |
| V= | 0.6888 | Iexp= | 6.86887208e-06 | Ifit= | 6.84809535e-06 |
| V= | 0.6916 | Iexp= | 6.89873492e-06 | Ifit= | 6.87842487e-06 |
| V= | 0.6944 | Iexp= | 6.89666924e-06 | Ifit= | 6.90804291e-06 |
| V= | 0.6972 | Iexp= | 6.94525668e-06 | Ifit= | 6.93696214e-06 |
| V= | 0.7    | Iexp= | 6.97180084e-06 | Ifit= | 6.96519544e-06 |

(Notice that fitting results may slightly differ from run to run because of the small amount disorder included via random number generation in data simulation)
